# Supplementary material for: Shaping of porous metal–organic framework granules using mesoporous ρ-alumina as a binder
Source: Royal Society of Chemistry journal article supplement (doi:10.1039/c7ra11764g), 2017-01-01
Supplement: c7ra11764g1.pdf [file c7ra11764g1.pdf]

## SUPLIMENTARY MATERIALS

### Shaping of Porous Metal–Organic Framework Granules Using Mesoporous $\rho$ -Alumina as Binder

Anil H. Valekar<sup>a,b</sup>, Kyung-Ho Cho<sup>a</sup>, U-Hwang Lee<sup>a,b\*</sup>, Ji-Sun Lee<sup>a</sup>, Ji Woong Yoon<sup>a</sup>,  
Young Kyu Hwang<sup>a,b</sup>, Seung Gwan Lee<sup>c</sup>, Sung June Cho<sup>c\*</sup>, and Jong-San Chang<sup>a,d\*</sup>

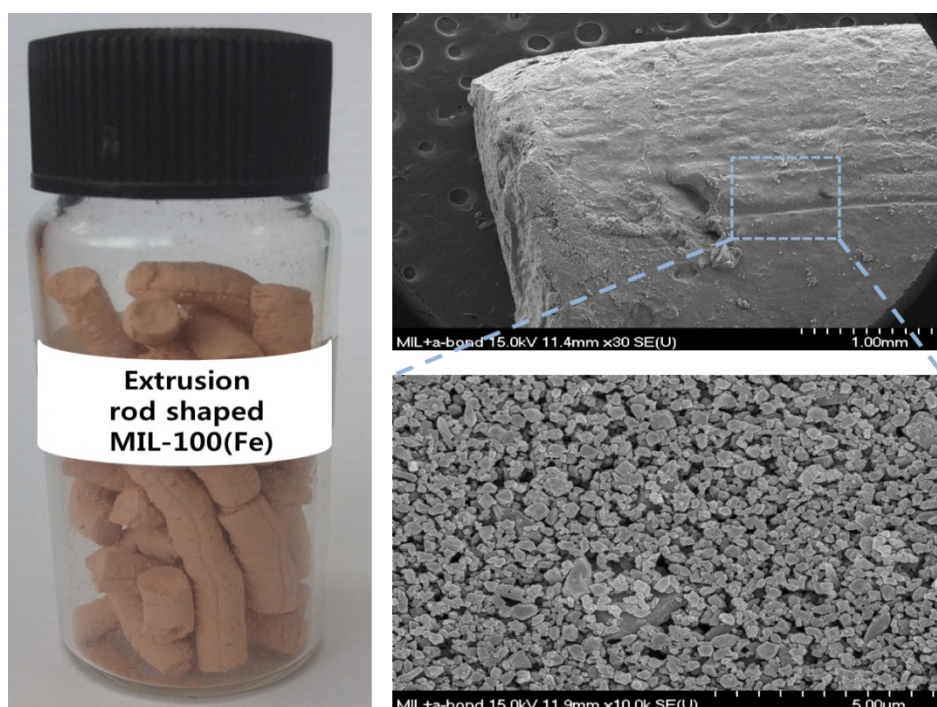

**Figure S1:** Photograph and SEM image of rod-shaped MIL-100(Fe) using MRA binder.

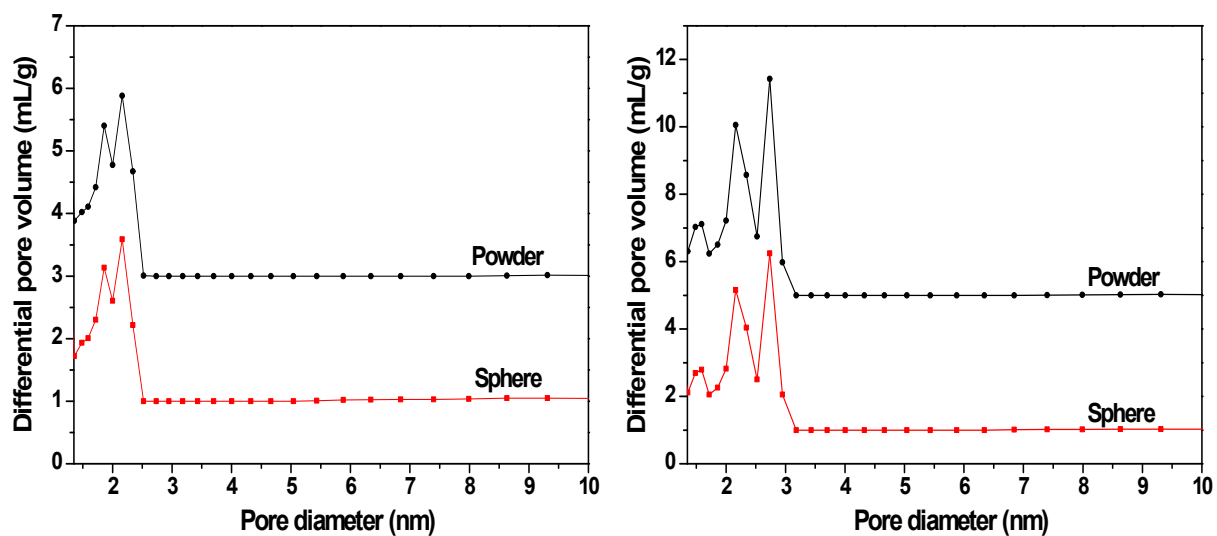

**Figure S2:** Pore-size distribution curves of powder and spheres of MIL-100(Fe) (left) and MIL-101(Cr) (right), calculated by density functional theory (DFT).

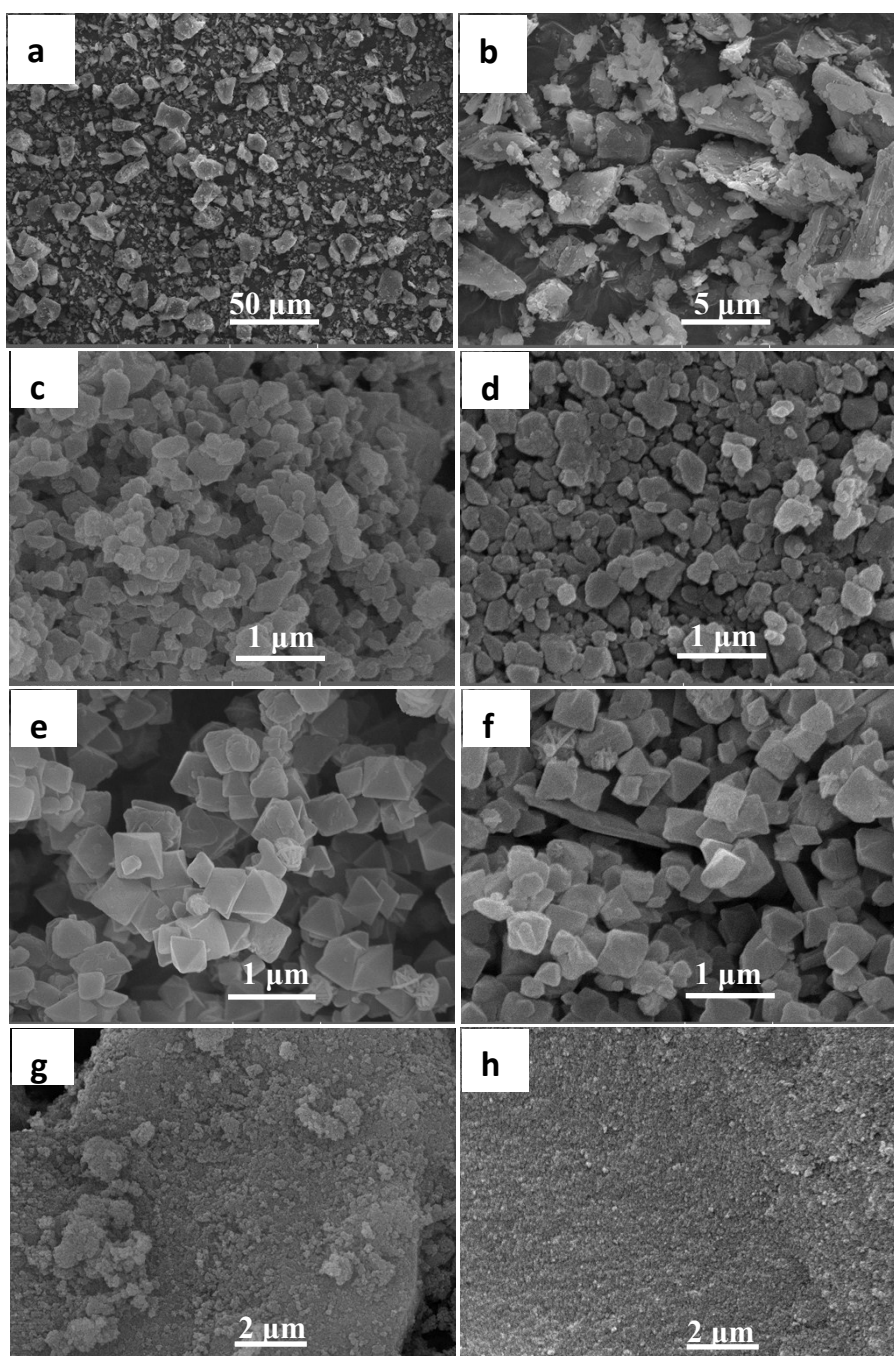

**Figure S3:** SEM images of MRA at a) low and b) high magnification and SEM images of c) MIL-100(Fe) powder, d) MIL-100(Fe) spheres, e) MIL-101(Cr) powder, f) MIL-101(Cr) spheres, g) UiO-66(Zr) powder, and h) UiO-66(Zr) spheres. All shaped MOF bodies contained 5 wt% MRA binder.

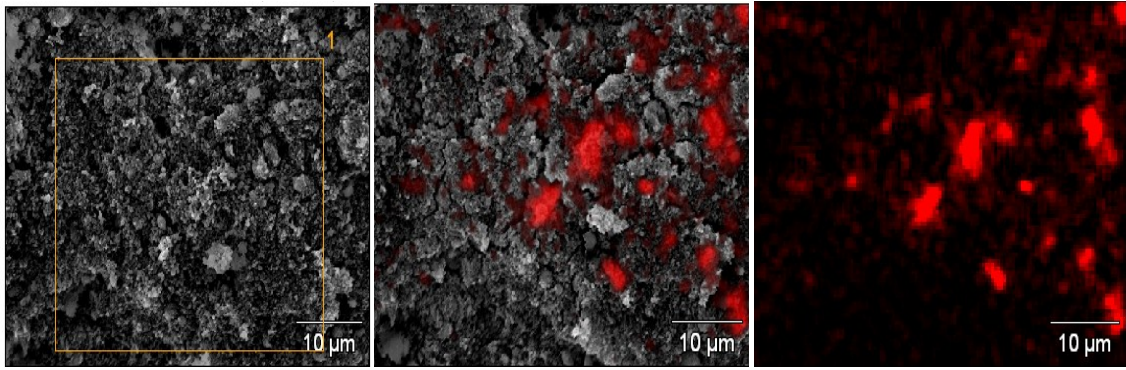

**Figure S4:** SEM-EDS elemental mapping of interior of spheres of MIL-101(Cr). Red areas indicate the presence of Al from 20 wt% MRA binder

Activation condition : 250°C for 6 h

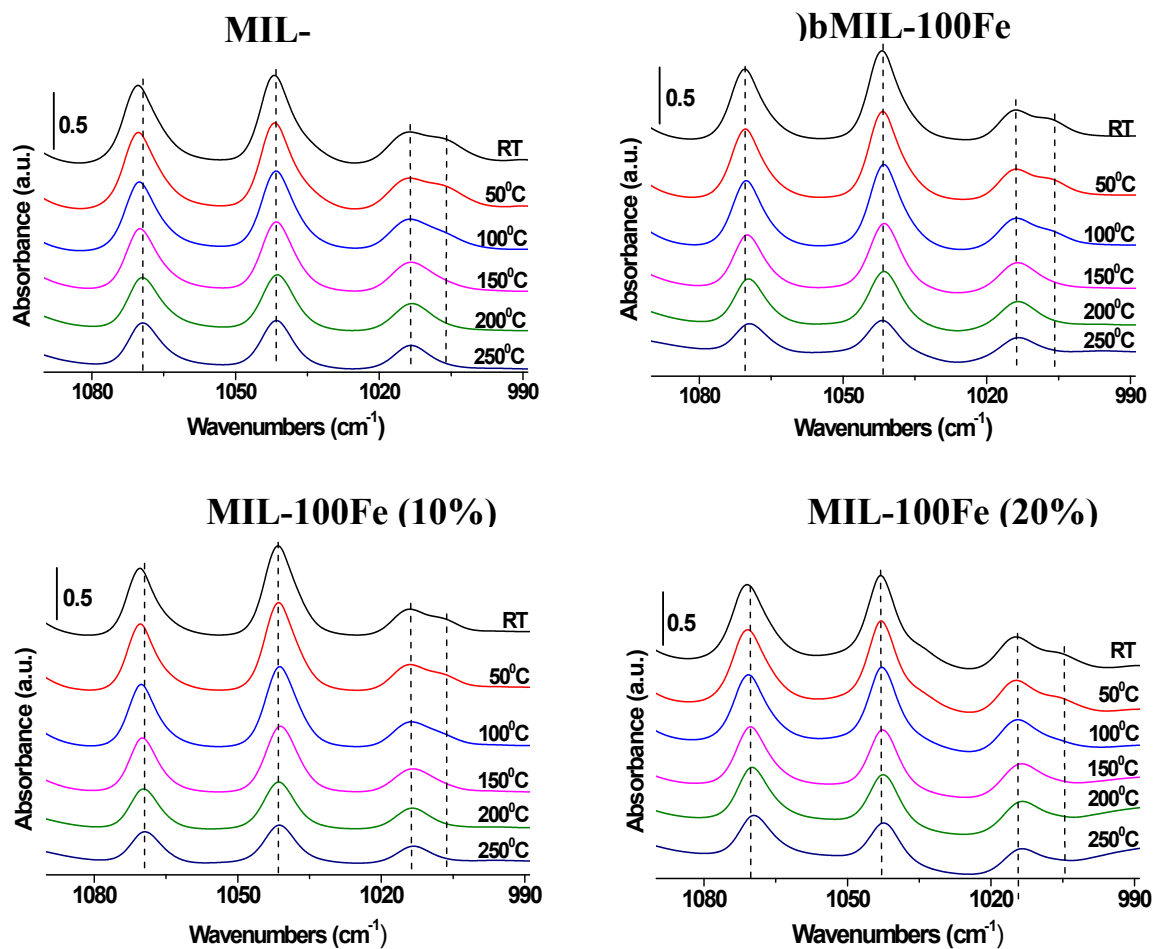

Figure S5: Temperature-dependent in-situ pyridine-IR spectra of MIL-100(Fe) powder and spheres with different MRA contents (indicated in parentheses).

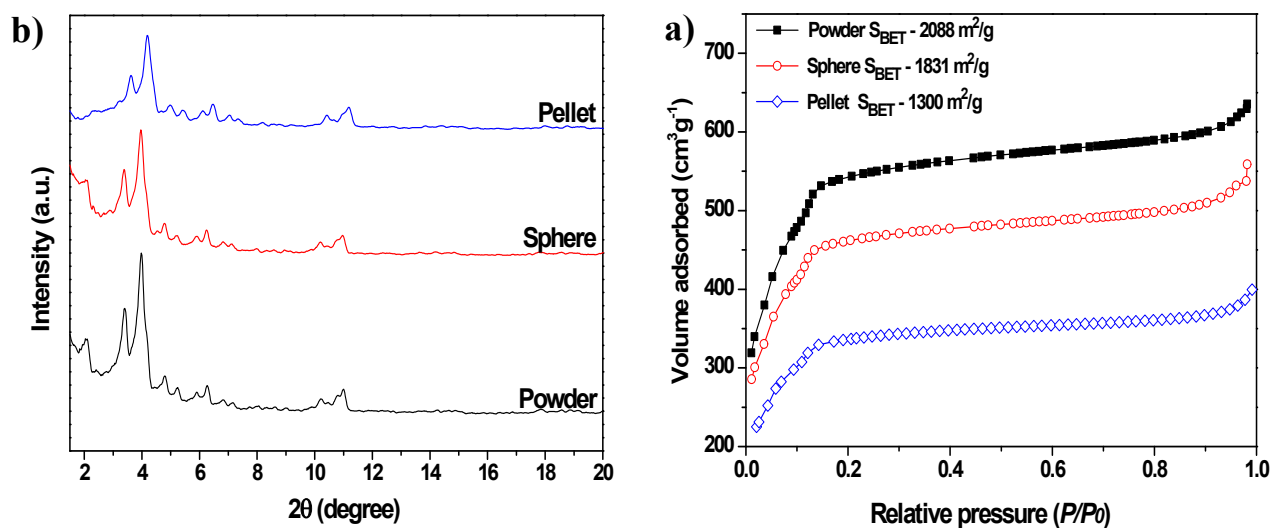

**Figure S6:** Comparison of powder, sphere, and pellet form of MIL-100(Fe): a) XRD patterns and b) N<sub>2</sub> adsorption isotherms at 77 K.

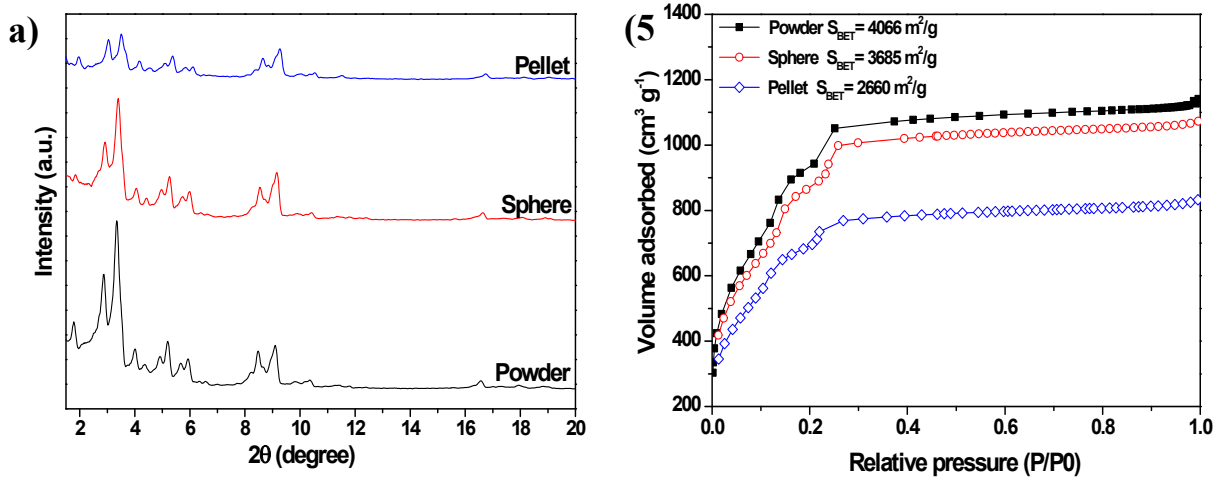

**Figure S7:** Comparison of powder, sphere, and pellet form of MIL-101(Cr): a) XRD patterns and b) N<sub>2</sub> adsorption isotherms at 77 K.

**Table S1.** Summary of porous properties of MOFs before and after shaping by various shaping methods.

| MOF                          | Additives                        | Shaped body  | BET Surface area (m <sup>2</sup> /g) |             |           | Pore volume (cm <sup>3</sup> /g) |             | Ref |
|------------------------------|----------------------------------|--------------|--------------------------------------|-------------|-----------|----------------------------------|-------------|-----|
|                              |                                  |              | Powder                               | Shaped body | Loss (%)  | Powder                           | Shaped body |     |
| Zr-MOF (UiO-66)              | 10% Sucrose <sup>a</sup>         | Spheres      | 1367                                 | 674         | 50.7      | 0.44                             | 0.21        | 1   |
| MIL-125 (Ti)-NH <sub>2</sub> | 8% Polymer <sup>a</sup>          | Granules     | 1250                                 | 930         | 25.6      | 0.5                              | 0.36        | 2   |
| SIM-1                        | NO <sup>b</sup>                  | Pellet       | 516                                  | 458-370     | 11.2-28.3 | ---                              | ---         | 3   |
| UiO-66 <sup>b</sup>          | 1% graphite <sup>b</sup>         | Pellet       | 1140                                 | 885         | 22.4      | ---                              | ---         | 4   |
| HKUST-1                      | 37-67% polystyrene <sup>c</sup>  | Microspheres | 1430                                 | 757-32      | 47.1-97.8 | ---                              | ---         | 5   |
| UiO-66                       | 23-33% Polyurethane <sup>d</sup> | Foam         | 1175                                 | 511-427     | 56.5-63.7 | 0.5                              | 0.21-0.17   | 6   |
| ZIF-8                        | 20-50 Polysulfone <sup>d</sup>   | Sphere       | 1023                                 | 761-128     | 25.6-87.5 | ---                              | ---         | 7   |

<sup>a</sup> -granulation, <sup>b</sup>-pressing, <sup>c</sup>-spray drying and <sup>d</sup>-composite mixture shaping methods were used to shape the respective MOF.



## References

1. J. Ren, N. M. Musyoka, H. W. Langmi, A. Swartbooi, B. C. North, M. Mathe *Int. J. Hydrogen Energ*, 2015, **40**, 4617-4622.
2. M. J. Regufe, J. Tamajon, A. Ribeiro, A. Ferreira., U-H. Lee, Y. Hwang, J.-S. Chang, C. Serre, J. Loureiro, A. Rodrigues, *Energy & Fuels*, 2015, **29**, 4654-4664.
3. D. Bazer-Bachi , L. Assié , V. Lecocq, B. Harbuzarua, V. Falk, *Powder Technol.*, 2014, **255**, 52–59.
4. M. A. Moreira, J. C. Santos, A. F. P. Ferreira, J. M. Loureiro, F. Ragon, P. Horcajada, K.-E. Shim, Y.-K. Hwang, U.-H. Lee, J.-S. Chang, C. Serre, A. E. Rodrigues, *Langmuir*, 2012, **28**, 5715–5723
5. A. Carne-Sanchez, I. Imazl, M. Cano-Sarabia, D. Maspoch, *Nature Chem*, 2013, **5**, 203-211.
6. M. L Pinto, S. Dias, J. Pires, *ACS Appl. Mater. Interfaces*, 2013, **5**, 2360–2363.
7. L. Li, J. Yao, P. Xiao, J. Shang, Y. Feng, P. A. Webley, H. Wang, *Clloid. Polym. Sci.* 2013, **291**, 2711-2717.
